# Depolarizing Actions of Hydrogen Sulfide on Hypothalamic Paraventricular Nucleus Neurons

C. Sahara Khademullah, Alastair V. Ferguson\*

Department of Biomedical and Molecular Science, Queen's University, Kingston, Ontario, Canada

## Abstract

Hydrogen sulfide ( $H_2S$ ) is a novel neurotransmitter that has been shown to influence cardiovascular functions as well and corticotrophin hormone (CRH) secretion. Since the paraventricular nucleus of the hypothalamus (PVN) is a central relay center for autonomic and endocrine functions, we sought to investigate the effects of  $H_2S$  on the neuronal population of the PVN. Whole cell current clamp recordings were acquired from the PVN neurons and sodium hydrosulfide hydrate (NaHS) was bath applied at various concentrations (0.1, 1, 10, and 50 mM). NaHS (1, 10, and 50 mM) elicited a concentration-response relationship from the majority of recorded neurons, with almost exclusively depolarizing effects following administration. Cells responded and recovered from NaHS administration quickly and the effects were repeatable. Input differences from baseline and during the NaHS-induced depolarization uncovered a biphasic response, implicating both a potassium and non-selective cation conductance. The results from the neuronal population of the PVN shed light on the possible physiological role that  $H_2S$  has in autonomic and endocrine function.

**Citation:** Khademullah CS, Ferguson AV (2013) Depolarizing Actions of Hydrogen Sulfide on Hypothalamic Paraventricular Nucleus Neurons. PLoS ONE 8(5): e64495. doi:10.1371/journal.pone.0064495

**Editor:** Zhong-Ping Feng, University of Toronto, Canada

**Received:** January 23, 2013; **Accepted:** April 15, 2013; **Published:** May 17, 2013

**Copyright:** © 2013 Khademullah, Ferguson. This is an open-access article distributed under the terms of the Creative Commons Attribution License, which permits unrestricted use, distribution, and reproduction in any medium, provided the original author and source are credited.

**Funding:** Funding provided by the Canadian Institute of Health Research (MT-12192; www.cihr-irsc.gc.c). The funder had no role in study design, data collection and analysis, decision to publish, or preparation of the manuscript.

**Competing Interests:** The authors have declared that no competing interests exist.

\* E-mail: avf@queensu.ca

## Introduction

Hydrogen sulfide ( $H_2S$ ) is produced endogenously in mammals in a variety of different cells types from the brain, blood, skin, liver, and kidney [1]. It is considered to be the third gasotransmitter, along with carbon monoxide (CO) and nitric oxide (NO) [1,2]. Since it was first observed to have non-toxic physiological effects in the brain by Abe and Kimura [3], the search to uncover alternative therapeutic roles for  $H_2S$  has taken off. It has been implicated in the induction of long-term potentiation in the hippocampus, blood pressure regulation, inflammation, protection against oxidative stress, and the neuroendocrine stress axis [2–6].

$H_2S$  is produced by the action of one of three enzymes found in the mammalian body, cystathionine beta-synthase (CBS), cystathionine gamma-lyase (CSE), and 3-mercaptopyruvate sulfurtransferase (3-MST) [7], which biosynthesizes L-cysteine into  $H_2S$  [8]. While not all aspects of endogenous  $H_2S$  production are well understood, physiological sources of  $H_2S$  include its production by enzymatic action, as well as release in response to physiological stimuli from stored pools in the cytosol and/or mitochondria [9]. These three enzymes have been suggested to be differentially distributed throughout the body, with CBS being highly expressed in brain tissue [3,10], CSE in the liver, kidney, thoracic aorta, ileum, gastrointestinal tract, portal vein and uterus [11], and 3-MST localized to the mitochondria [12]. A source of non-enzymatically produced  $H_2S$  appears to be inorganic polysulfides in red blood cells [13]. This ability for red blood cells to convert polysulfides into  $H_2S$  allows for it to be delivered through dietary means [14]. While the physiological sources of  $H_2S$  remain poorly understood, there are a few mechanism suggested in the literature.

Although difficult to measure endogenously,  $H_2S$  concentrations in the brain have been estimated to be approximately  $8 \mu M$  [15], while plasma concentrations have been suggested to be as high as  $160 \mu M$  [1]. At these physiologically relevant concentrations,  $H_2S$  has been found to play a role in vasoconstriction, as well as vasodilation. A study by d'Emmanuele di Villa Bianca and colleagues [16], showed that the application of a variety of NaHS doses ( $10 \mu M$ – $1 mM$ ) to the superior mesenteric artery produced vasoconstricting effects at low concentrations, while at high concentrations, NaHS caused vasodilation. Exogenous  $H_2S$  has been shown to reduce blood pressure in various rat models [4], while Yang and colleagues [17], showed increases in blood pressure in CSE knockout mice. Studies observing  $H_2S$  effects in the hippocampus showed that  $H_2S$  enhanced NMDA receptor currents and facilitated hippocampal long-term potentiation (LTP) [18]. It was also found that NaHS abolished 6-hydroxydopamine (6-OHDA)-induced cell death and, as a result, rescued SH-SY5Y cells [19]. In the substantia nigra compacta, administration of NaHS eliminated 1-methyl-4-phenyl-1,2,3,6-tetrahydropyridine (MPTP)-induced dopaminergic neuronal loss [20]. In hypothalamic tissue, NaHS induces a concentration dependent decrease in the release of KCl stimulated corticotrophin-releasing hormone (CRH) [2]. Various ion channels have been implicated in these physiological responses to  $H_2S$ , including ATP-sensitive potassium channels ( $K^+_{ATP}$ ), large conductance calcium activated potassium channels ( $BK_{Ca}$ ), both T-type and L-type calcium channels, as well as chloride, transient receptor potential (TRP), and sodium channels (Nav 1.5) [6,13,21–23].

The paraventricular nucleus of the hypothalamus (PVN), located against the third ventricle within the hypothalamus, is a

critical autonomic control center of the hypothalamus [24,25]. More specifically, it has been implicated in central cardiovascular and volume control, including blood pressure regulation [26]. The PVN is also known for its role in the activation of the hypothalamo-pituitary-adrenocortical (HPA) axis through the secretion of the corticotrophin-releasing hormone (CRH) [27]. The PVN consists of three different cell types: magnocellular neurons (MNC), parvocellular preautonomic neurons (PA), and parvocellular neuroendocrine neurons (NE) [28,29]. The magnocellular neurons project to the posterior pituitary gland and secrete oxytocin (OT) or vasopressin (VP). The parvocellular preautonomic neurons project to the brain stem and the spinal cord and secrete OT, VP, CRH, or thyrotrophin-releasing hormone (TRH). Lastly, the parvocellular neuroendocrine neurons project to the median eminence and secrete CRH and TRH [30]. Recent evidence suggests that the PVN may act as a site of action for H<sub>2</sub>S. Microarray analysis has demonstrated that the three enzymes necessary to catalyze H<sub>2</sub>S are all present in the PVN and more recently, Gan and colleagues [31], found that microinjections of H<sub>2</sub>S into the PVN produce cardiovascular changes, although the physiological mechanisms through which H<sub>2</sub>S concentrations in the PVN might be regulated remain to be established. The purpose of the present study was to assess the role of H<sub>2</sub>S in the

PVN and the downstream physiological effects it may have using patch-clamp recordings.

## Methods

### Slice preparation

Male Sprague-Dawley rats (Charles River, Quebec, Canada) aged 21–28 days were decapitated according to the regulations established by the Canadian Council on Animal Care and approved by the Queen's University Animal Care Committee. The brains were removed and placed in ice-cold solution composed of (in mM): 87 NaCl, 2.5 KCl, 25 NaHCO<sub>3</sub>, 0.5 CaCl<sub>2</sub>, 7 MgCl<sub>2</sub>, 1.25 NaH<sub>2</sub>PO<sub>4</sub>, 25 glucose, 75 sucrose bubbled with 95% O<sub>2</sub>/5% CO<sub>2</sub>. The region of the hypothalamus containing the PVN was isolated, and 300 μm coronal sections were cut using a vibratome (Leica, Nussloch, Germany). Slices were then incubated at 32°C for a minimum 1 hour prior to recording in carbogenated artificial cerebrospinal fluid (aCSF) containing (in mM): 126 NaCl, 2.5 KCl, 26 NaHCO<sub>3</sub>, 2 CaCl<sub>2</sub>, 2 MgCl<sub>2</sub>, 1.25 NaH<sub>2</sub>PO<sub>4</sub>, 10 glucose saturated.

### Electrophysiology

Slices were mounted onto the stage of the recording chamber, which was continuously perfused at a flow rate of 2–3 ml/min

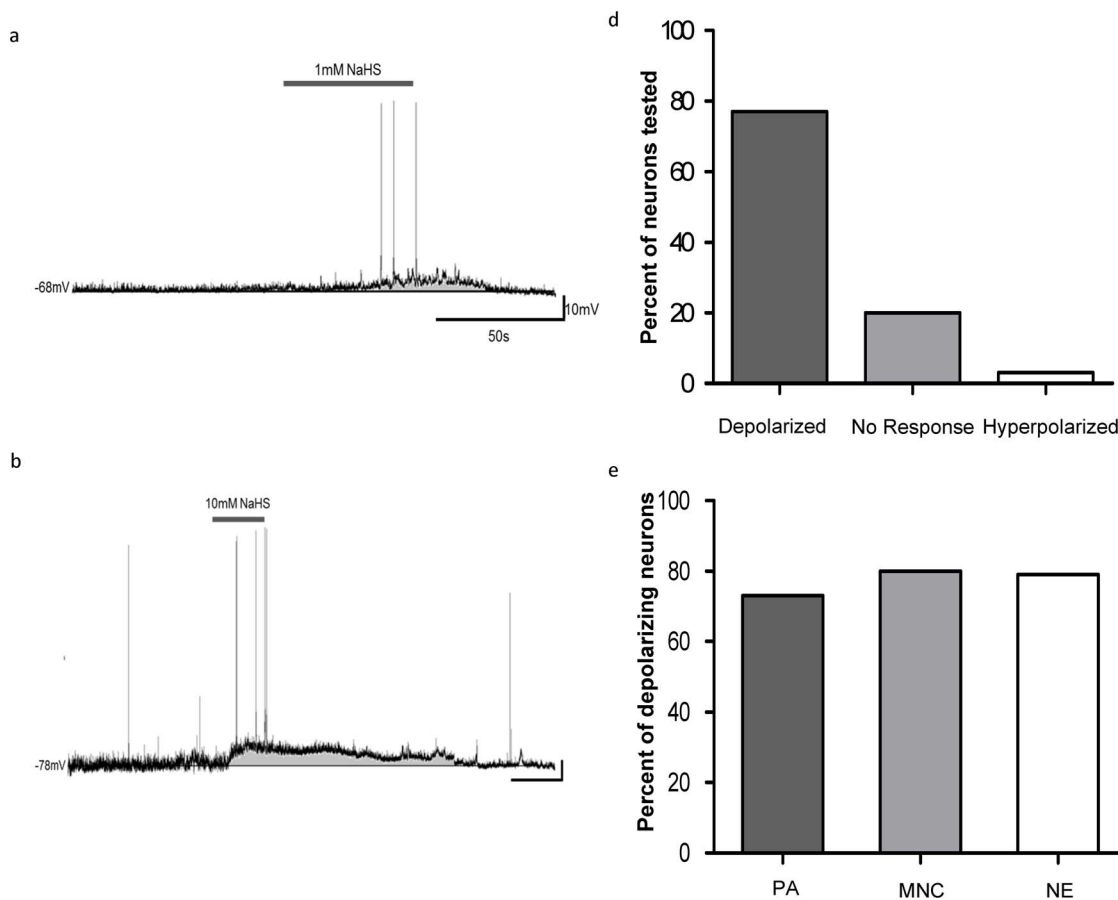

**Figure 1. Hydrogen sulfide depolarizes PVN neurons.** Traces illustrate the depolarizing effects of NaHS application on PVN neurons. a) Current clamp recording trace illustrating a depolarizing response to 1 mM NaHS. Trace b) shows a current clamp recording illustrating a depolarizing response to 10 mM NaHS. Bar graph c) illustrates the various responses to NaHS (0.1–50 mM) of PVN neurons (80%, n = 52/65 depolarized, 20%, n = 13/65 showed no response, and 3%, n = 2/65 hyperpolarized). Bar graph d) shows the percentage of PA (73%, n = 24/33), MNC (80%, n = 12/15), and NE (79%, n = 11/14) neurons that depolarized. doi:10.1371/journal.pone.0064495.g001

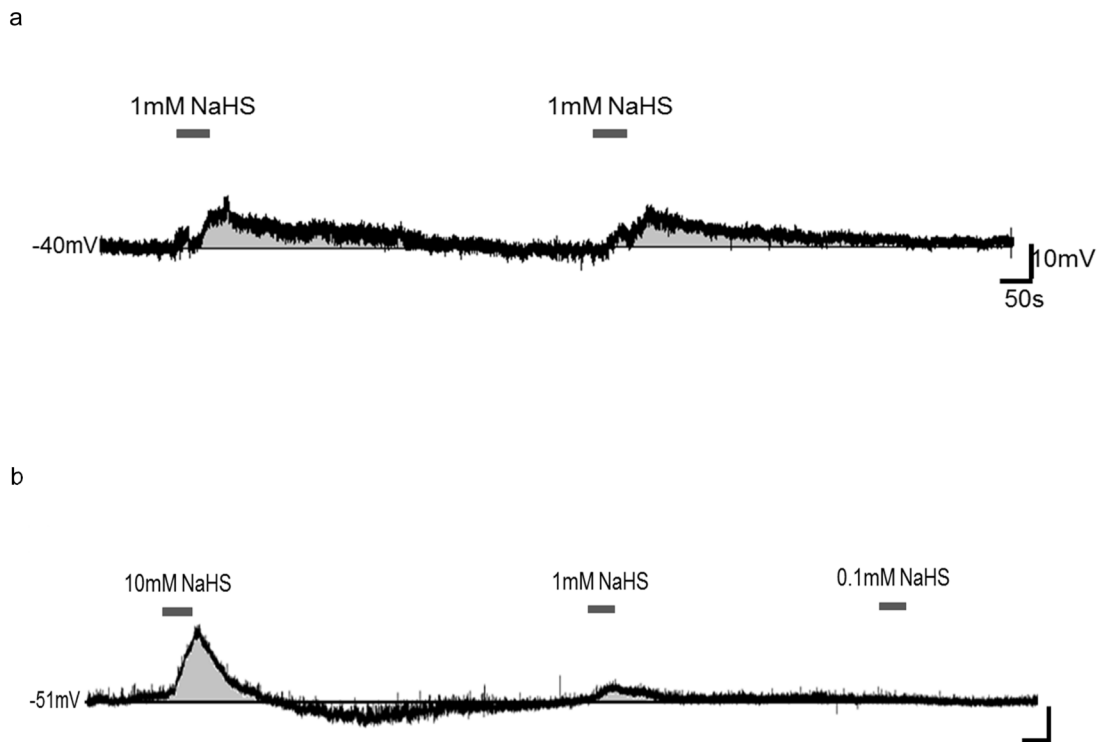

**Figure 2. Hydrogen sulfide has reproducible responses and effects the various cell types in a similar manner.** a) Current clamp recording trace illustrating a PVN neuron's rapid and repeatable response and recovery to 1 mM NaHS. Trace b) shows various concentrations (10 mM, 1 mM, and 0.1 mM) applied in the same neuron. doi:10.1371/journal.pone.0064495.g002

with carbogenated aCSF at approximately 32°C. An upright differential interference contrast microscope (Scientifica, Sussex, United Kingdom) at 40× magnification was used to visualize the neurons. Using a Sutter Instruments P97 flaming micropipette puller, borosilicate glass electrodes (World Precision Instruments, Sarasota, Florida, USA) were pulled and filled with an intracellular solution composed of (in mM): 125 potassium gluconate, 10 KCl, 2 MgCl<sub>2</sub>, 0.1 CaCl<sub>2</sub>, 5.5 EGTA, 10 HEPES, 2 NaATP (pH 7.2 with KOH). Electrodes were optimized to have a resistance of 3–5 MΩ. Whole cell recordings were made with a Multiclamp 700B amplifier (Molecular Devices, Sunnyvale, California, USA) and acquired at 10 kHz, and filtered at 2.4 kHz using a Micro 1401 interface. Once a high resistance seal was obtained, whole cell configuration was accomplished by breaking through the cell membrane to gain access to the internal contents of the cell through the application of a brief period of negative pressure. Only neurons with a minimum spike amplitude of 60 mV (range 60–100 mV), input resistance of >400 MΩ (range 400–1100 MΩ), and series resistance of <20 MΩ (range 8–20 MΩ) were included in our subsequent analysis. The data was recorded in Spike2 software for offline analysis (Cambridge Electronic Devices, Cambridge, UK). PVN neurons were characterized as MNC (delayed return to baseline in response to a hyperpolarizing pulse), PA (calcium spike in response to a hyperpolarizing pulse), or NE (neither of the above) using a standard current pulse protocol prior to the application of NaHS [28]. Following a minimum 100 s baseline recording period, specific known concentrations of sodium hydrosulfide hydrate (NaHS) were applied to slices through a bath perfusion system. The response to NaHS was determined by comparing the mean membrane potential of the neuron before and after application and averaged across 100 second time periods. A

response was considered significant if the change in membrane potential after NaHS application was at least twice the amplitude of the standard deviation of the baseline membrane potential during 100 seconds prior to application. Descriptive statistics were also used to describe mean group data as well as the standard error of the means in all such groups. The recorded membrane potential was adjusted to correct for the calculated junction potential (−15 mV).

### Chemicals and drugs

All salts used to prepare the slicing solution, aCSF, and the internal recording solutions, NaHS were obtained from Sigma-Aldrich Pharmaceuticals (Oakville, Ontario, Canada).

## Results

### Hydrogen sulfide influences the excitability of PVN neurons

Hydrogen sulfide was bath applied to a total of 65 PVN neurons during current-clamp recordings. The majority (n = 52, 80%) of neurons were responsive, with (96%) of responsive cells depolarizing, which was characterized by a rapid rise in membrane potential immediately after NaHS entered the bath, followed by maintenance of the effects for the duration of donor application, and a rapid recovery to baseline membrane potential associated of replacement of bath solution with aCSF (Fig. 1). The effects of NaHS were reproducible, in that when the same concentration was applied for a second time while recording from the same neuron, a similar second response was observed as illustrated in Figure 2a. The depolarizations were usually accompanied by an increase in firing frequency during the initial rise in membrane

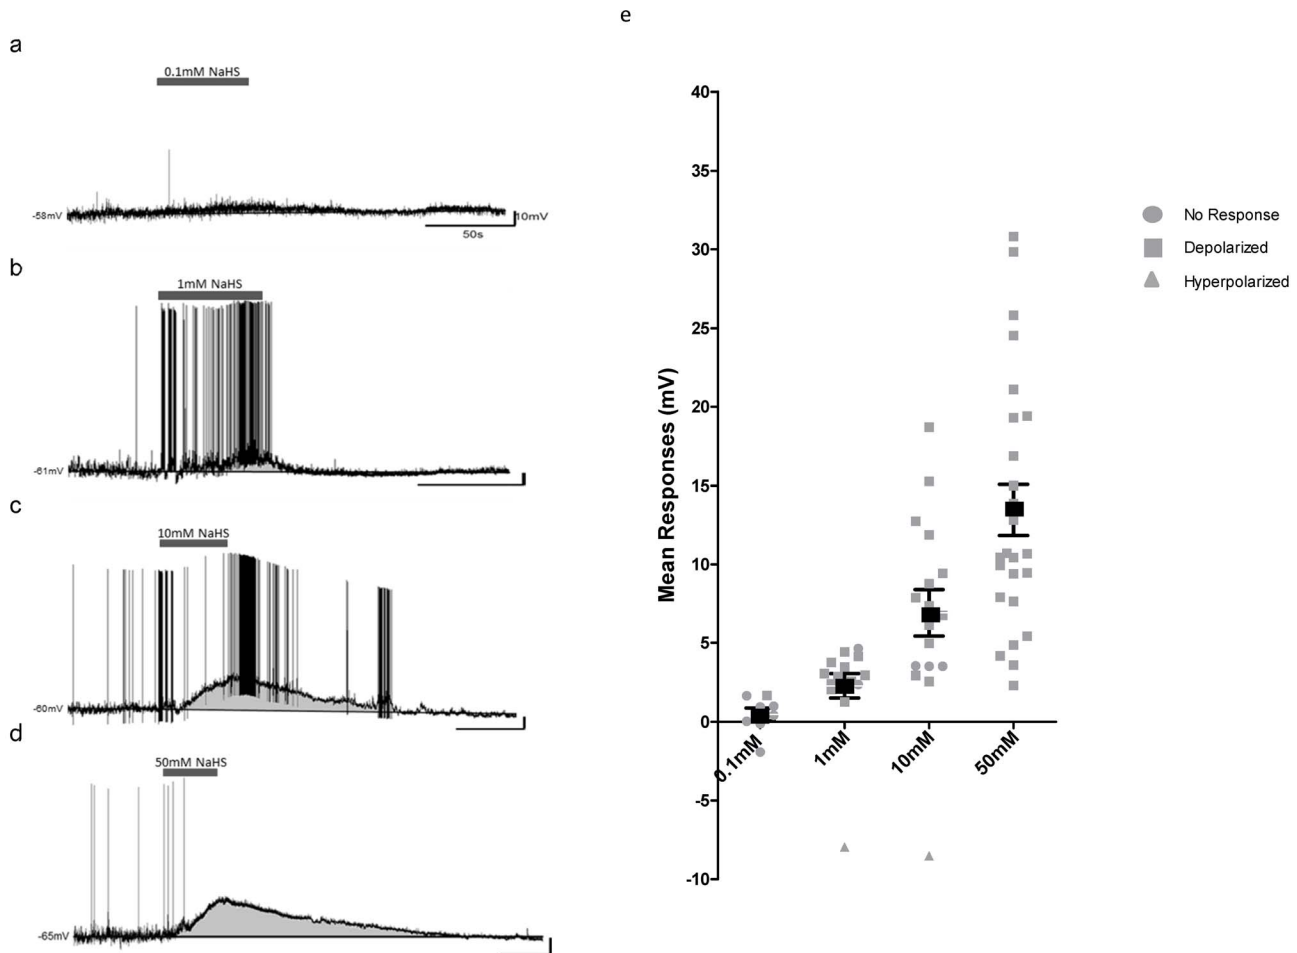

**Figure 3. Hydrogen sulfide has a concentration dependent relationship.** Traces illustrate the magnitude of the depolarizations in response to the various NaHS concentrations (0.1, 1, 10, and 50 mM). As the concentrations increase so does the response. a) Current clamp recording trace illustrating no response to 0.1 mM NaHS. b) Current clamp recording trace illustrating a depolarizing response to 1 mM NaHS. c) Current clamp recording trace illustrating a depolarizing response to 10 mM NaHS. d) Current clamp recording trace illustrating a depolarizing response to 50 mM NaHS, with an increase in firing frequency during the initial phase of the depolarization. e) Scatter plot showing the response of all recorded neurons to the various NaHS concentrations (0.1, 1, 10, and 50 mM) with the mean response and standard deviations indicated by the black square and bars. doi:10.1371/journal.pone.0064495.g003

potential (Fig. 3b, c, and d). The remaining 2 (4%) cells influenced by NaHS responded with a rapid, long lasting hyperpolarization followed by a return to baseline. The depolarizations also appeared to be mediated by more than one ion channel as shown in Figure 4.

#### Hydrogen sulfide exerts similar effects on MNC, PA, and NE PVN neurons

We also examined the effects of hydrogen sulfide on PVN neurons differentially classified according to their electrophysiological fingerprints as MNC, PA or NE. NaHS influenced the membrane potential of PA neurons (73% depolarize, 27% no response,  $n = 33$ ), MN neurons (80% depolarize, 13% hyperpolarize, 7% no response,  $n = 15$ ) and NE neurons (79% depolarize, 21% no response,  $n = 14$ ) (Fig. 2b). After categorizing the neurons according to these criteria, it appears that NaHS does not influence the distinct cell types in a different manner and therefore all cell types were grouped together for analysis.

#### Hydrogen sulfide affects PVN neurons in a concentration-dependent manner

The depolarizing effects of NaHS were also found to be concentration dependent as illustrated in Figure 3e. Bath application of 50 mM NaHS elicited a depolarizing (mean  $13.46 \pm 1.62$  mV) response in 100% ( $n = 25$ ) of the recorded neurons, followed by a return to baseline membrane potential which usually occurred within 60 s as illustrated in Figure 3d. We also examined the effects of lower concentrations of NaHS, with 10 mM influencing 79% ( $n = 11/14$ ) of neurons tested with 10 of 11 showing depolarizations (mean  $10.38 \pm 1.34$  mV) and similar recovery times, as illustrated in Figure 3c and e, while the 1 cell which hyperpolarized ( $-8.53$  mV) showed a much longer recovery time of nearly 10 minutes. A similar pattern of responsiveness was seen following 1 mM NaHS with 83% ( $n = 15/18$ ) of neurons responding, with the majority ( $n = 14$ ) of neurons showing much smaller depolarizing effects ( $3.00 \pm 0.28$  mV), and similar short recovery times which can be seen in Figure 3b. Again 1 cell hyperpolarized ( $-8$  mV) again with a longer recovery time of 3 minutes. Bath application of 0.1 mM NaHS failed to elicit a response in 7 of the 8 cells tested

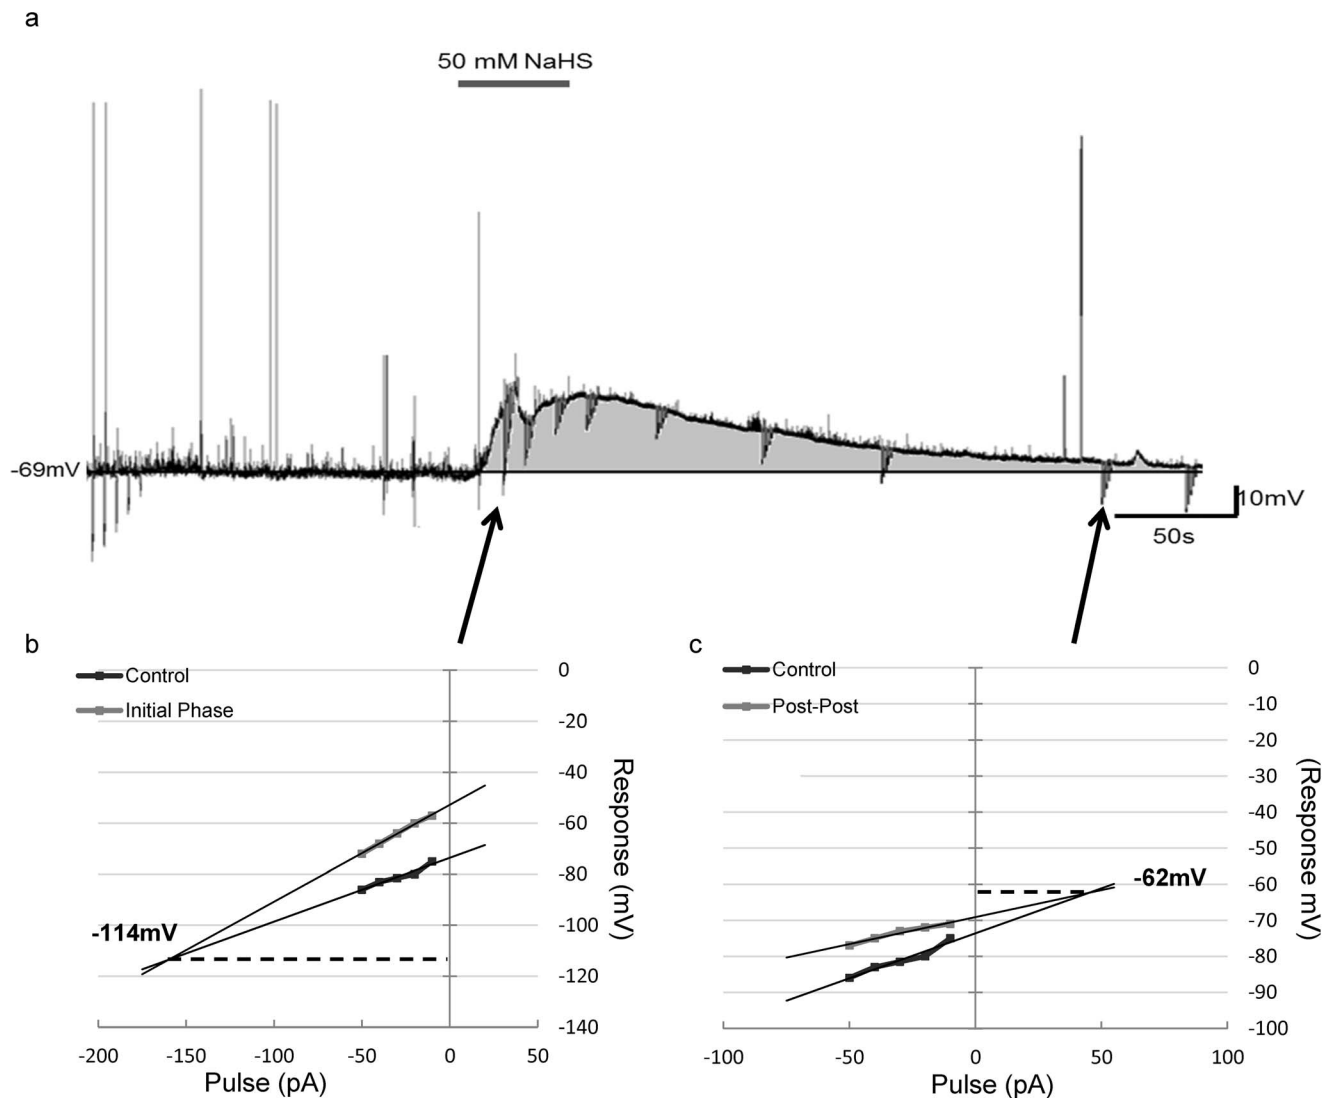

**Figure 4. Hydrogen sulfide-induced depolarization is biphasic.** a) Current clamp recording trace illustrating the change in input resistance over the duration of the hydrogen sulfide-induced depolarization (50 mM). b) V/I plot showing the change in input resistance (point of intercept, 114 mV), during the initial phase of the depolarization. c) V/I plot showing the change in input resistance (point of intercept, 62 mV), during the recovery phase of the depolarization. Input resistance calculated from the slope of the line. doi:10.1371/journal.pone.0064495.g004

as illustrated in Figure 3a, although 1 neuron responded with a small depolarization (1.7 mV). Overall, the vast majority of the PVN neurons tested responded with depolarization and the concentration dependent nature of these effects are summarized in Figure 3e.

#### Hydrogen sulfide-induced depolarization is mediated by multiple ion channels

In order to identify potential ion channels responsible for the NaHS-induced depolarization, we applied hyperpolarizing current step protocols to the neurons to examine the changes in input resistance. This hyperpolarizing pulse protocol was applied prior to the application of NaHS, immediately following the application (initial phase), and as the membrane potential was recovering back to baseline from the effect (recovery phase). Voltage/current (V/I) plots were generated for all five points and demonstrated as illustrated in Figure 4 that NaHS resulted in an initial large increase in input resistance (control vs. initial phase) during the

initial phase of the depolarization, as seen in Figure 4b, followed by a large decrease (control vs. recovery phase) during the recovery phase which often lasted beyond a return to baseline membrane potential (Fig. 4c). The point of intersection of these voltage current plots also provided information about the reversal potential for ion channels potentially modulated by H<sub>2</sub>S. This point was calculated from the slope of the control line versus the slope of either the line from the initial phase or from the recovery phase. The intersecting points were then averaged for each group (initial phase vs. recovery phase). This analysis suggested the initial stage of the NaHS-induced depolarization may result from the inhibition of potassium channels as the reversal potential was  $-103.6 \pm 8.4$  mV ( $n = 5$ ) (Fig. 4b). Conversely, the point of intersection taken from voltage current plots during the recovery phase ( $-53.6 \pm 9.8$  mV,  $n = 5$ ) indicated the involvement of a non-selective cation current as illustrated in Figure 4c.

## Discussion

In this study we have used *in vitro* whole-cell patch clamp techniques to show that the H<sub>2</sub>S donor, NaHS increases the excitability of the majority of neurons within the PVN as shown in Figure 1d, suggesting important roles for H<sub>2</sub>S in the regulation of diverse neuroendocrine and autonomic function [24]. We observed that the H<sub>2</sub>S donor caused rapid onset and reversible depolarizations in the vast majority of PVN neurons tested as illustrated in Figure 1 a, b, and c, these effects were similar to those previously reported in dorsal raphe serotonergic neurons and oxygen sensing cells in trout gill chemoreceptors neurons [32,33]. Nagai and colleagues [34] reported that H<sub>2</sub>S produced an increase in intracellular calcium (Ca<sup>2+</sup>) concentrations and Ca<sup>2+</sup> waves in cultured astrocytes and hippocampal slices, suggesting potentially important interactions between glia and neurons, interactions which could contribute to depolarizing responses [35]. The depolarizing effects appeared to be concentration dependent with only 1 neuron responding by depolarization to 0.1 mM NaHS, with increasing magnitude depolarizations following 1 mM, 10 mM, and 50 mM which was the highest concentration tested in our studies (Fig. 3). Similarly, Umemura and Kimura [36] reported that H<sub>2</sub>S has dose-dependent responses on the reduced metabolic activity in rat neuronal cultures and neuroblastomas. A concentration dependent response was also seen in hypoglossal rootlets of medullary brain slices, in which there was increased activity as the H<sub>2</sub>S concentration was increased [37].

According to the definition given by Abe and Kimura, [3], the lower concentration used (0.1 mM) falls within the physiologically relevant range, which is similar to the endogenous H<sub>2</sub>S concentrations reported in brain homogenates (~160 μm). It is important to note that since H<sub>2</sub>S is a fairly volatile and an unstable gas, the concentrations that were stated and desired may not have been the final concentrations to reach the cells [38]. According to Olson [38], approximately 13% of dissolved H<sub>2</sub>S is lost with every minute of application, and the loss continues to increase when the solution is oxygenated. Therefore, higher concentrations of the donor may be necessary to elicit a response [38]. When dissolved in aCSF at 37°C, H<sub>2</sub>S has a pH of 7.6 [39]. While we measured the lower concentrations (0.1 mM, 1 mM, and 10 mM) to be within close range of what can be considered physiologically relevant by definition, it should also be noted that both the pH and the osmolality measures across all of the concentrations except for the highest (50 mM) were within physiologically acceptable ranges [40,41].

Also, of importance is the ability of NaHS to produce such rapid responses and recoveries of the membrane potential in the PVN neurons, as illustrated in Figure 2a. The rapid neuronal response produced by H<sub>2</sub>S can translate into rapid onset and inhibition of physiological effects. These results are comparable to the results obtained in the carotid body in response to H<sub>2</sub>S administration [42]. With that said, while the neurons were able to rapidly recover back to baseline, the integrity of the cell may not have fully recovered. It appeared that for an extended period of time after the neuron had recovered and achieved the pre-NaHS administration resting membrane potential it showed a decrease in input resistance, implying that several ion channels remained open (Fig. 4a).

The present work is the first to suggest that H<sub>2</sub>S acts to modulate two different ion channels as summarized in Figure 4. We observed different reversal potentials for effects on input

resistance immediately after H<sub>2</sub>S application when compared to the later period during recovery to the control membrane potential. Our reversal potential data indicates that NaHS in the PVN is modulating a potassium current immediately following administration, indicated in Figure 4b, however, as the neuron's membrane potential recovers toward baseline a separate conductance with a reversal potential in the range of a nonselective cation conductance is apparently activated (Fig. 4c). While our data implicates both potassium and non-selective cation channels in the depolarizations produced by NaHS, future voltage clamp studies will be necessary, both to confirm such actions on these specific conductances, as well as to more clearly define the membrane events underlying such interactions. In accordance with our observations potassium channels have been implicated as one of the primary targets through which H<sub>2</sub>S exerts its vascular effects to produce changes in blood pressure and other cardiovascular variables [43]. In the central nervous system, H<sub>2</sub>S has also been implicated in altering intracellular potassium levels which are known to regulate cellular apoptosis, through effects on osmolality, caspase activation, and mitochondrial activity [44]. A recent study observing the effects of H<sub>2</sub>S in the brain, have shown that not only can it rescue the brain from cerebral hypoxia in a concentration dependent manner, it does so through a potassium channel [45]. A number of other groups have associated H<sub>2</sub>S elicited responses with numerous nonselective ion channels, showing that H<sub>2</sub>S can modulate its effects through various TRP channels to produce anti-inflammatory responses [46].

Our data also shows that the administration of NaHS produces consistent responses among the MNC, NE, and PA neurons within the PVN, as illustrated in Figure 2b. These cell types send projections to different brain regions including the brain stem, anterior pituitary, and the median eminence to mediate physiological autonomic and endocrine functions [24,28]. This finding provides some evidence that H<sub>2</sub>S may have implications on several core autonomic and endocrine functions, such as, circadian rhythm, cardiovascular function, the stress axis and fluid balance, among others, as a result of the consistent depolarizations observed across all PVN cell types by the administration of NaHS. Some evidence for this was observed by another group which demonstrated an H<sub>2</sub>S concentration dependent decrease in potassium chloride stimulated CRH release from rat hypothalamic explants, which downstream inhibited stress-related glucocorticoid release [2]. Most recently, Gan and colleagues [31], observed increases in renal sympathetic nerve activity, mean arterial pressure and heart rate in response to NaHS microinjections into the PVN, further indicating that H<sub>2</sub>S has an effect on the physiological functions produce by the PVN.

Our electrophysiological studies of the effects of NaHS on neurons in the PVN are the first to show that this neuromodulator exerts direct actions on the excitability of this neuronal population. Our results were also able to shed light on the possible ion channels involved in NaHS modulation in the PVN, and provide insight into the possible role of NaHS in autonomic and endocrine function.

## Author Contributions

Conceived and designed the experiments: CSK AVF. Performed the experiments: CSK. Analyzed the data: CSK. Contributed reagents/materials/analysis tools: AVF. Wrote the paper: CSK AVF.

## References

- Wang R (2002) Two's company, three's a crowd: can H<sub>2</sub>S be the third endogenous gaseous transmitter? *FASEB J* 16: 1792–1798. 10.1096/fj.02-0211hyp [doi];16/13/1792 [pii].
- Dello RC, Tringali G, Ragazzoni E, Maggiano N, Menini E, et al. (2000) Evidence that hydrogen sulphide can modulate hypothalamo-pituitary-adrenal axis function: in vitro and in vivo studies in the rat. *J Neuroendocrinol* 12: 225–233. jne441 [pii].
- Abe K, Kimura H (1996) The possible role of hydrogen sulfide as an endogenous neuromodulator. *J Neurosci* 16: 1066–1071.
- Ahmad FU, Sattar MA, Rathore HA, Abdullah MH, Tan S, et al. (2012) Exogenous hydrogen sulfide (H<sub>2</sub>S) reduces blood pressure and prevents the progression of diabetic nephropathy in spontaneously hypertensive rats. *Ren Fail* 34: 203–210. 10.3109/0886022X.2011.643365 [doi].
- Caliendo G, Cirino G, Santagata V, Wallace JL (2010) Synthesis and biological effects of hydrogen sulfide (H<sub>2</sub>S): development of H<sub>2</sub>S-releasing drugs as pharmaceuticals. *J Med Chem* 53: 6275–6286. 10.1021/jm901638j [doi].
- Kimura Y, Dargusch R, Schubert D, Kimura H (2006) Hydrogen sulfide protects HT22 neuronal cells from oxidative stress. *Antioxid Redox Signal* 8: 661–670. 10.1089/ars.2006.8.661 [doi].
- Sen U, Sathnur PB, Kundu S, Givvimani S, Coley DM, et al. (2012) Increased endogenous H<sub>2</sub>S generation by CBS, CSE, and 3MST gene therapy improves ex vivo renovascular relaxation in hyperhomocysteinemia. *Am J Physiol Cell Physiol* 303: C41–C51. ajpcell.00398.2011 [pii];10.1152/ajpcell.00398.2011 [doi].
- Telezkhin V, Brazier SP, Cayzac S, Muller CT, Riccardi D, et al. (2009) Hydrogen sulfide inhibits human BK(Ca) channels. *Adv Exp Med Biol* 648: 65–72. 10.1007/978-90-481-2259-2\_7 [doi].
- Ishigami M, Hiraki K, Umemura K, Ogasawara Y, Ishii K, et al. (2009) A source of hydrogen sulfide and a mechanism of its release in the brain. *Antioxid Redox Signal* 11: 205–214. 10.1089/ARS.2008.2132 [doi].
- Enokido Y, Suzuki E, Iwasawa K, Namekata K, Okazawa H, et al. (2005) Cystathionine beta-synthase, a key enzyme for homocysteine metabolism, is preferentially expressed in the radial glia/astrocyte lineage of developing mouse CNS. *FASEB J* 19: 1854–1856. 05-3724fje [pii];10.1096/fj.05-3724fje [doi].
- Hosoki R, Matsuki N, Kimura H (1997) The possible role of hydrogen sulfide as an endogenous smooth muscle relaxant in synergy with nitric oxide. *Biochem Biophys Res Commun* 237: 527–531. S0006-291X(97)96878-9 [pii];10.1006/bbrc.1997.6878 [doi].
- Shibuya N, Tanaka M, Yoshida M, Ogasawara Y, Togawa T, et al. (2009) 3-Mercaptopyruvate sulfurtransferase produces hydrogen sulfide and bound sulfane sulfur in the brain. *Antioxid Redox Signal* 11: 703–714. 10.1089/ARS.2008.2253 [doi].
- Peers C (2012) Modulation of ion channels and transporters by carbon monoxide: causes for concern? *Front Physiol* 3: 477. 10.3389/fphys.2012.00477 [doi].
- Benavides GA, Squadrito GL, Mills RW, Patel HD, Isbell TS, et al. (2007) Hydrogen sulfide mediates the vasoactivity of garlic. *Proc Natl Acad Sci U S A* 104: 17977–17982. 0705710104 [pii];10.1073/pnas.0705710104 [doi].
- Furne J, Saeed A, Levitt MD (2008) Whole tissue hydrogen sulfide concentrations are orders of magnitude lower than presently accepted values. *Am J Physiol Regul Integr Comp Physiol* 295: R1479–R1485. 90566.2008 [pii];10.1152/ajpregu.90566.2008 [doi].
- d'Emmanuele VBR, Sorrentino R, Coletta C, Mitidieri E, Rossi A, et al. (2011) Hydrogen sulfide-induced dual vascular effect involves arachidonic acid cascade in rat mesenteric arterial bed. *J Pharmacol Exp Ther* 337: 59–64. jpet.110.176016 [pii];10.1124/jpet.110.176016 [doi].
- Yang G, Wu L, Jiang B, Yang W, Qi J, et al. (2008) H<sub>2</sub>S as a physiologic vasorelaxant: hypertension in mice with deletion of cystathionine gamma-lyase. *Science* 322: 587–590. 322/5901/587 [pii];10.1126/science.1162667 [doi].
- Kimura H (2000) Hydrogen sulfide induces cyclic AMP and modulates the NMDA receptor. *Biochem Biophys Res Commun* 267: 129–133. 10.1006/bbrc.1999.1915 [doi];S0006-291X(99)91915-0 [pii].
- Xie L, Tiong CX, Bian JS (2012) Hydrogen sulfide protects SH-SY5Y cells against 6-hydroxydopamine-induced endoplasmic reticulum stress. *Am J Physiol Cell Physiol* 303: C81–C91. ajpcell.00281.2011 [pii];10.1152/ajpcell.00281.2011 [doi].
- Lu M, Zhao FF, Tang JJ, Su CJ, Fan Y, et al. (2012) The neuroprotection of hydrogen sulfide against MPTP-induced dopaminergic neuron degeneration involves uncoupling protein 2 rather than ATP-sensitive potassium channels. *Antioxid Redox Signal* 17: 849–859. 10.1089/ars.2011.4507 [doi].
- Nelson MT, Todorovic SM, Perez-Reyes E (2006) The role of T-type calcium channels in epilepsy and pain. *Curr Pharm Des* 12: 2189–2197.
- Pan Z, Yang H, Reinach PS (2011) Transient receptor potential (TRP) gene superfamily encoding cation channels. *Hum Genomics* 5: 108–116. A603104897018018 [pii].
- Strege PR, Bernard CE, Kraichely RE, Mazzone A, Sha L, et al. (2011) Hydrogen sulfide is a partially redox-independent activator of the human jejunum Na<sup>+</sup> channel, Nav1.5. *Am J Physiol Gastrointest Liver Physiol* 300: G1105–G1114. ajpgi.00556.2010 [pii];10.1152/ajpgi.00556.2010 [doi].
- Swanson LW, Sawchenko PE (1980) Paraventricular nucleus: a site for the integration of neuroendocrine and autonomic mechanisms. *Neuroendocrinology* 31: 410–417.
- Powers-Martin K, Phillips JK, Biancardi VC, Stern JE (2008) Heterogeneous distribution of basal cyclic guanosine monophosphate within distinct neuronal populations in the hypothalamic paraventricular nucleus. *Am J Physiol Regul Integr Comp Physiol* 295: R1341–R1350. 00063.2008 [pii];10.1152/ajpregu.00063.2008 [doi].
- Ramchandra R, Hood SG, Frithiof R, McKinley MJ, May CN (2013) The role of the paraventricular nucleus of the hypothalamus in the regulation of cardiac and renal sympathetic nerve activity in conscious normal and heart failure sheep. *J Physiol* 591: 93–107. jphysiol.2012.236059 [pii];10.1113/jphysiol.2012.236059 [doi].
- Herman JP, Prewitt CM, Cullinan WE (1996) Neuronal circuit regulation of the hypothalamo-pituitary-adrenocortical stress axis. *Crit Rev Neurobiol* 10: 371–394.
- Tasker JG, Dudek FE (1991) Electrophysiological properties of neurons in the region of the paraventricular nucleus in slices of rat hypothalamus. *J Physiol (Lond)* 434: 271–293.
- Stern JE (2001) Electrophysiological and morphological properties of preautonomic neurons in the rat hypothalamic paraventricular nucleus. *J Physiol* 537: 161–177.
- Michaud JL, Rosenquist T, May NR, Fan CM (1998) Development of neuroendocrine lineages requires the bHLH-PAS transcription factor SIM1. *Genes Dev* 12: 3264–3275.
- Gan XB, Liu TY, Xiong XQ, Chen WW, Zhou YB, et al. (2012) Hydrogen sulfide in paraventricular nucleus enhances sympathetic activity and cardiac sympathetic afferent reflex in chronic heart failure rats. *PLoS One* 7: e50102. 10.1371/journal.pone.0050102 [doi];PONE-D-12-25022 [pii].
- Kombian SB, Reiffenstein RJ, Colmers WF (1993) The actions of hydrogen sulfide on dorsal raphe serotonergic neurons in vitro. *J Neurophysiol* 70: 81–96.
- Olson KR, Healy MJ, Qin Z, Skovgaard N, Vulesevic B, et al. (2008) Hydrogen sulfide as an oxygen sensor in trout gill chemoreceptors. *Am J Physiol Regul Integr Comp Physiol* 295: R669–R680. 00807.2007 [pii];10.1152/ajpregu.00807.2007 [doi].
- Nagai Y, Tsugane M, Oka J, Kimura H (2004) Hydrogen sulfide induces calcium waves in astrocytes. *FASEB J* 18: 557–559. 10.1096/fj.03-1052fje [doi];03-1052fje [pii].
- Nedergaard M (1994) Direct signalling from astrocytes to neurons in cultures of mammalian brain cells. *Science* 263: 1768–1771.
- Umemura K, Kimura H (2007) Hydrogen sulfide enhances reducing activity in neurons: neurotrophic role of H<sub>2</sub>S in the brain? *Antioxid Redox Signal* 9: 2035–2041. 10.1089/ars.2007.1802 [doi].
- Hu H, Shi Y, Chen Q, Yang W, Zhou H, et al. (2008) Endogenous hydrogen sulfide is involved in regulation of respiration in medullary slice of neonatal rats. *Neuroscience* 156: 1074–1082. S0306-4522(08)01194-9 [pii];10.1016/j.neuroscience.2008.08.025 [doi].
- Olson KR (2012) A practical look at the chemistry and biology of hydrogen sulfide. *Antioxid Redox Signal* 17: 32–44. 10.1089/ars.2011.4401 [doi].
- Dombkowski RA, Russell MJ, Olson KR (2004) Hydrogen sulfide as an endogenous regulator of vascular smooth muscle tone in trout. *Am J Physiol Regul Integr Comp Physiol* 286: R678–R685. 10.1152/ajpregu.00419.2003 [doi];286/4/R678 [pii].
- Chesler M (2003) Regulation and modulation of pH in the brain. *Physiol Rev* 83: 1183–1221. 10.1152/physrev.00010.2003 [doi];83/4/1183 [pii].
- Lang RJ, Watson MJ (1998) Effects of nitric oxide donors, S-nitroso-L-cysteine and sodium nitroprusside, on the whole-cell and single channel currents in single myocytes of the guinea-pig proximal colon. *Br J Pharmacol* 123: 505–517.
- Peng YJ, Nanduri J, Raghuraman G, Souvannakitti D, Gadalla MM, et al. (2010) H<sub>2</sub>S mediates O<sub>2</sub> sensing in the carotid body. *Proc Natl Acad Sci U S A* 107: 10719–10724.
- Zhao W, Zhang J, Lu Y, Wang R (2001) The vasorelaxant effect of H<sub>2</sub>S as a novel endogenous gaseous K(ATP) channel opener. *EMBO J* 20: 6008–6016. 10.1093/emboj/20.21.6008 [doi].
- Yu SP (2003) Regulation and critical role of potassium homeostasis in apoptosis. *Prog Neurobiol* 70: 363–386. S030100820300090X [pii].
- Tay AS, Hu LF, Lu M, Wong PT, Bian JS (2010) Hydrogen sulfide protects neurons against hypoxic injury via stimulation of ATP-sensitive potassium channel/protein kinase C/extracellular signal-regulated kinase/heat shock protein 90 pathway. *Neuroscience* 167: 277–286. S0306-4522(10)00197-1 [pii];10.1016/j.neuroscience.2010.02.006 [doi].
- Streng T, Axelsson HE, Hedlund P, Andersson DA, Jordt SE, et al. (2008) Distribution and function of the hydrogen sulfide-sensitive TRPA1 ion channel in rat urinary bladder. *Eur Urol* 53: 391–399. S0302-2838(07)01310-3 [pii];10.1016/j.eururo.2007.10.024 [doi].
